# Supplementary material for: Nanostructure and thermal characteristics of silica/human serum albumin systems based on a modified nanosilica entero-vulnerosorbent
Source: Royal Society of Chemistry journal article supplement (doi:10.1039/d3cp04014c), 2024-01-01
Supplement: d3cp04014c1.pdf [file d3cp04014c1.pdf]

## Supplementary material for the paper:

### Nanostructure and thermal characteristics of silica/human serum albumin systems based on modified nanosilica entero- vulnerosorbent

**Authors:** Agnieszka Chrzanowska<sup>1\*</sup>, Liudmyla V. Nosach<sup>2</sup>, Anna Derylo-Marczewska<sup>1</sup>

<sup>1</sup>*Institute of Chemical Sciences, Faculty of Chemistry, Maria Curie-Skłodowska University in Lublin, M. Curie-Skłodowska Sq. 3, 20-031, Lublin, Poland*

<sup>2</sup>*Chuiko Institute of Surface Chemistry, National Academy of Sciences of Ukraine, 17 General Naumov Str., Kyiv 03164, Ukraine*

**\*Corresponding author:** E-mail: agnieszka.chrzanowska@mail.umcs.pl

#### *Thermal analysis of GM-nanosilica and protein/silica composite*

Table S1. TG data for initial and GM-nanosilicas in air atmosphere.

| Sample | TG            |              |                 |
|--------|---------------|--------------|-----------------|
|        | $M_{IDS}$ [%] | $M_I$ [%]    | $M_{TOTAL}$ [%] |
|        | 30-160 [°C]   | 160-900 [°C] |                 |
| NS     | 0.88          | 1.30         | 2.18            |
| GM-1 h | 1.60          | 1.89         | 3.49            |
| GM-4 h | 1.10          | 2.09         | 3.19            |
| GM-7 h | 1.04          | 2.12         | 3.16            |

$M_{IDS}$ , mass loss in the initial decomposition step;  $M_I$ , mass loss in the first decomposition step,  $M_{TOTAL}$ , total mass loss.
